# Supplementary material
Source: PubMed Central journal article supplement (PMC9237730)
Supplement: kiac166_supplementary_data.pdf [file kiac166_supplementary_data.pdf]

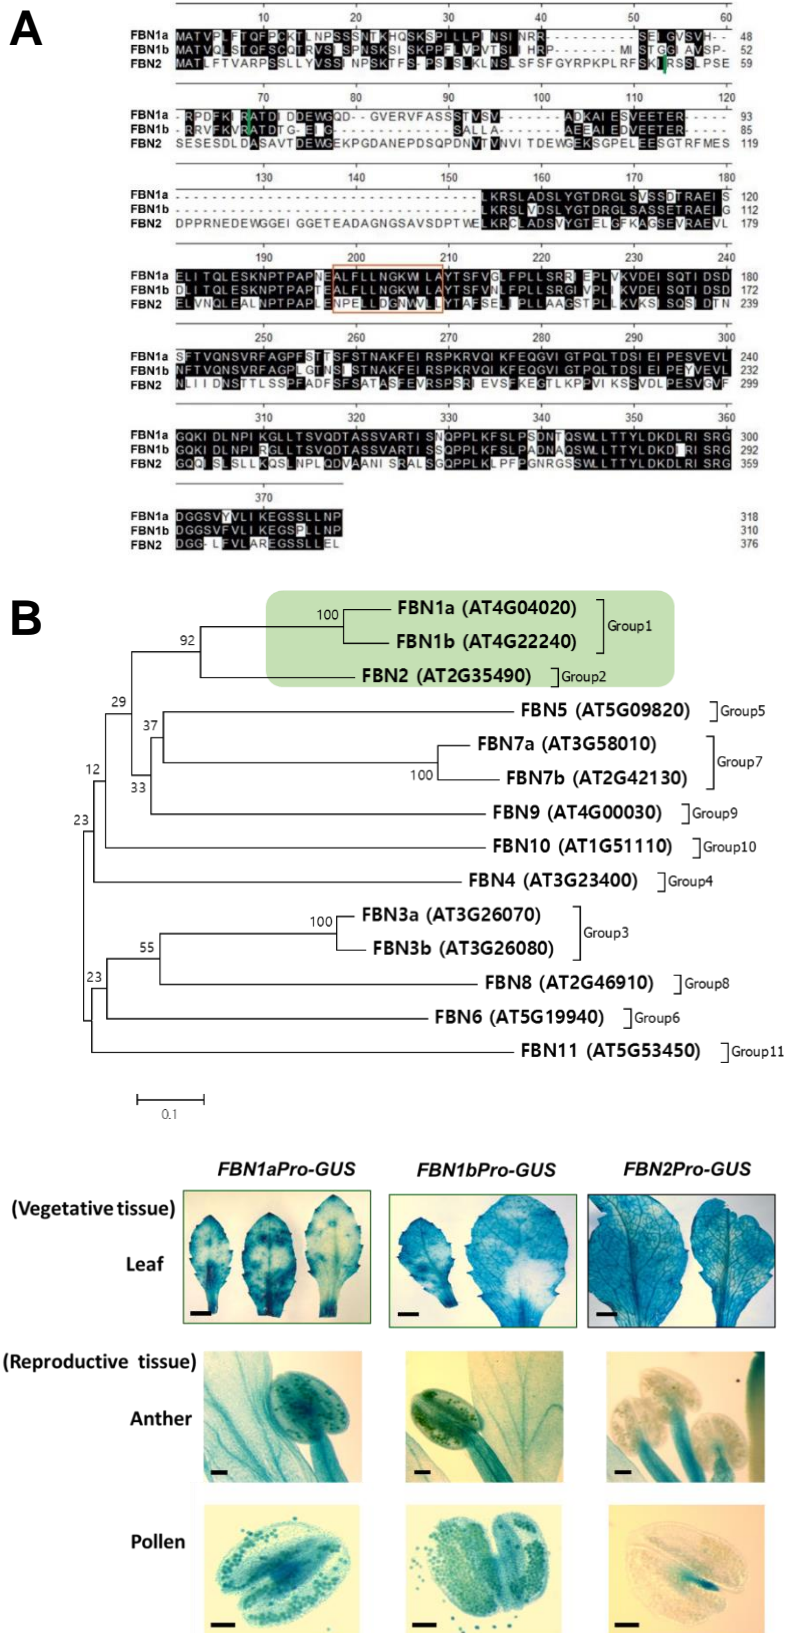

**Supplemental Figure S1. Comparison of protein sequences and expression patterns of *FBN1a*, *FBN1b*, and *FBN2*.** (A) Comparison of amino acid sequence of *FBN1a*, *1b*, and *2*, Orange (lipocalin motif), Green (start region of mature protein). (B) Phylogenetic tree of *FBN* gene family in Arabidopsis. The scale bar refer to evolutionary distances of the number of base substitutions per site. (C) GUS expression patterns for *FBN1a*, *FBN1b*, and *FBN2* promoters in vegetative and reproductive tissues. Scale bars = 5 mm for leaf, 20  $\mu$ m for anther and pollen.

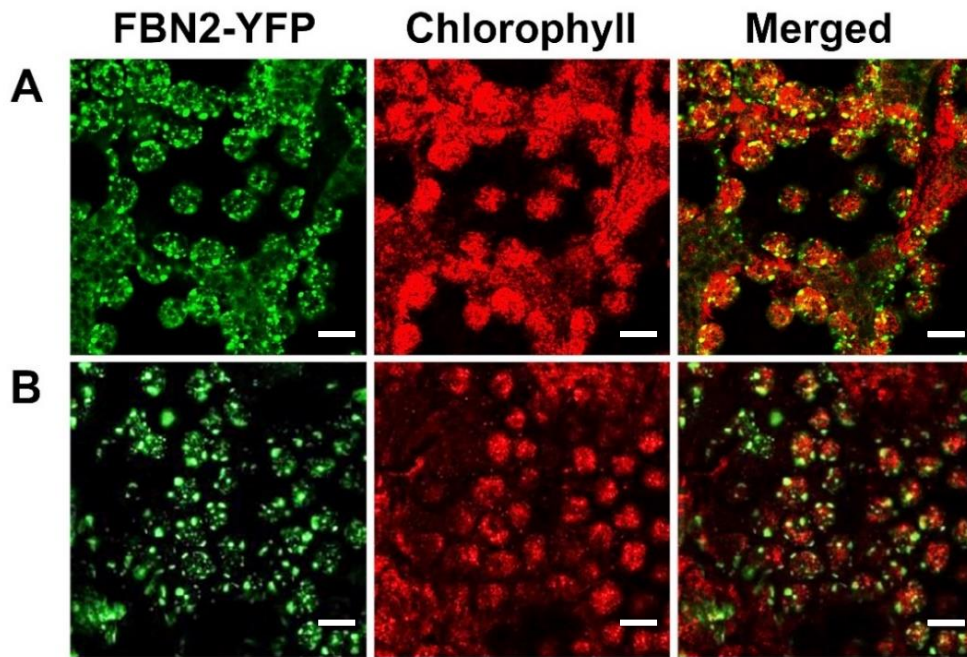

**Supplemental Figure S2. Subcellular localization of FBN2 in *Arabidopsis* and *N.benthamiana* cells.**

(A) YFP image of a leaf from *Arabidopsis* plant stably transformed with the 35S:FBN2-YFP construct. (B) YFP image of a leaf from *Nicotiana benthamiana* plant transiently transformed with the 35S: FBN2-YFP construct. Scale bar = 10  $\mu$ m.

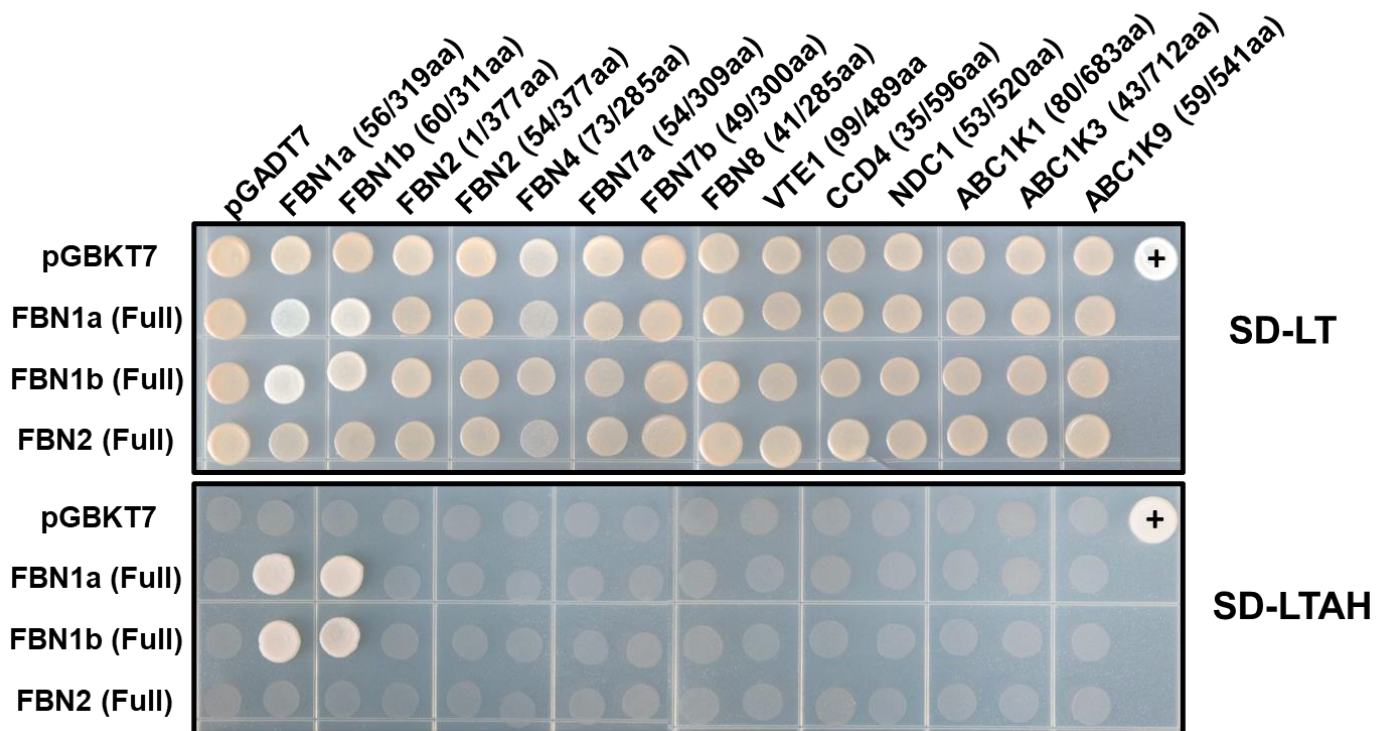

**Supplemental Figure S3. Yeast two-hybrid analysis of the interaction between FBN2 and PG proteins.** Yeast strain AH109 was co-transformed with pGBKT7-FBN1a, 1b, and 2 bait vector and pGADT7 prey vectors. Protein-protein interactions were grown on the SD/-Leu/Trp (non selective medium) and on the SD/-Leu/-Trp/-Ade/-His (selective medium). p53/tag protein interaction was used as positive control, and the pGBKT7 and pGADT7 empty vectors were used as negative control.

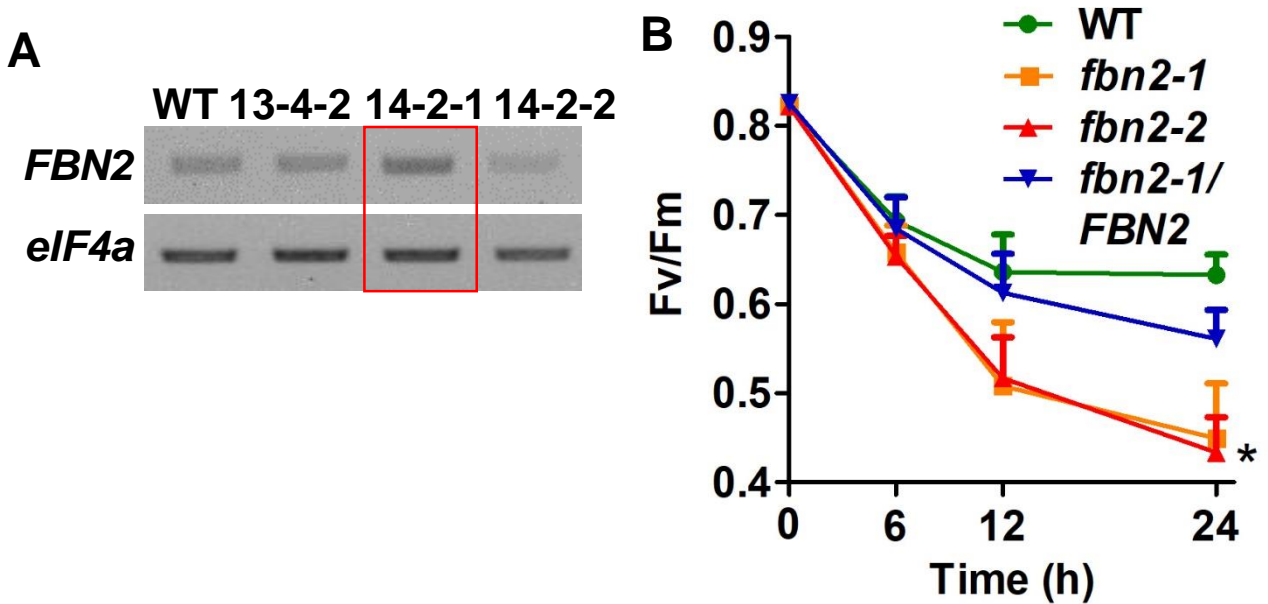

**Supplemental Figure S4. Complementation of *fbn2-1* mutant in Arabidopsis.** (A) *FBN2* expression in wild type and three *fbn2-1+35S:FBN2* complementation plants by RT-PCR. 14-2-1 line was used for *fbn2-1/FBN2* of (B). (B) Maximum quantum yield of PSII (Fv/Fm) in the wild type and *fbn2* mutants, complementation lines under high-light/cold stress ( $850 \mu\text{mol m}^{-2} \text{s}^{-1}$  light/ $15^\circ\text{C}$ ). Data represent means with SEM from independent samples ( $n = 3$ ). Statistically significant differences from wild type are indicated by one-way ANOVA with Tukey's post test ( $*p < 0.05$ )

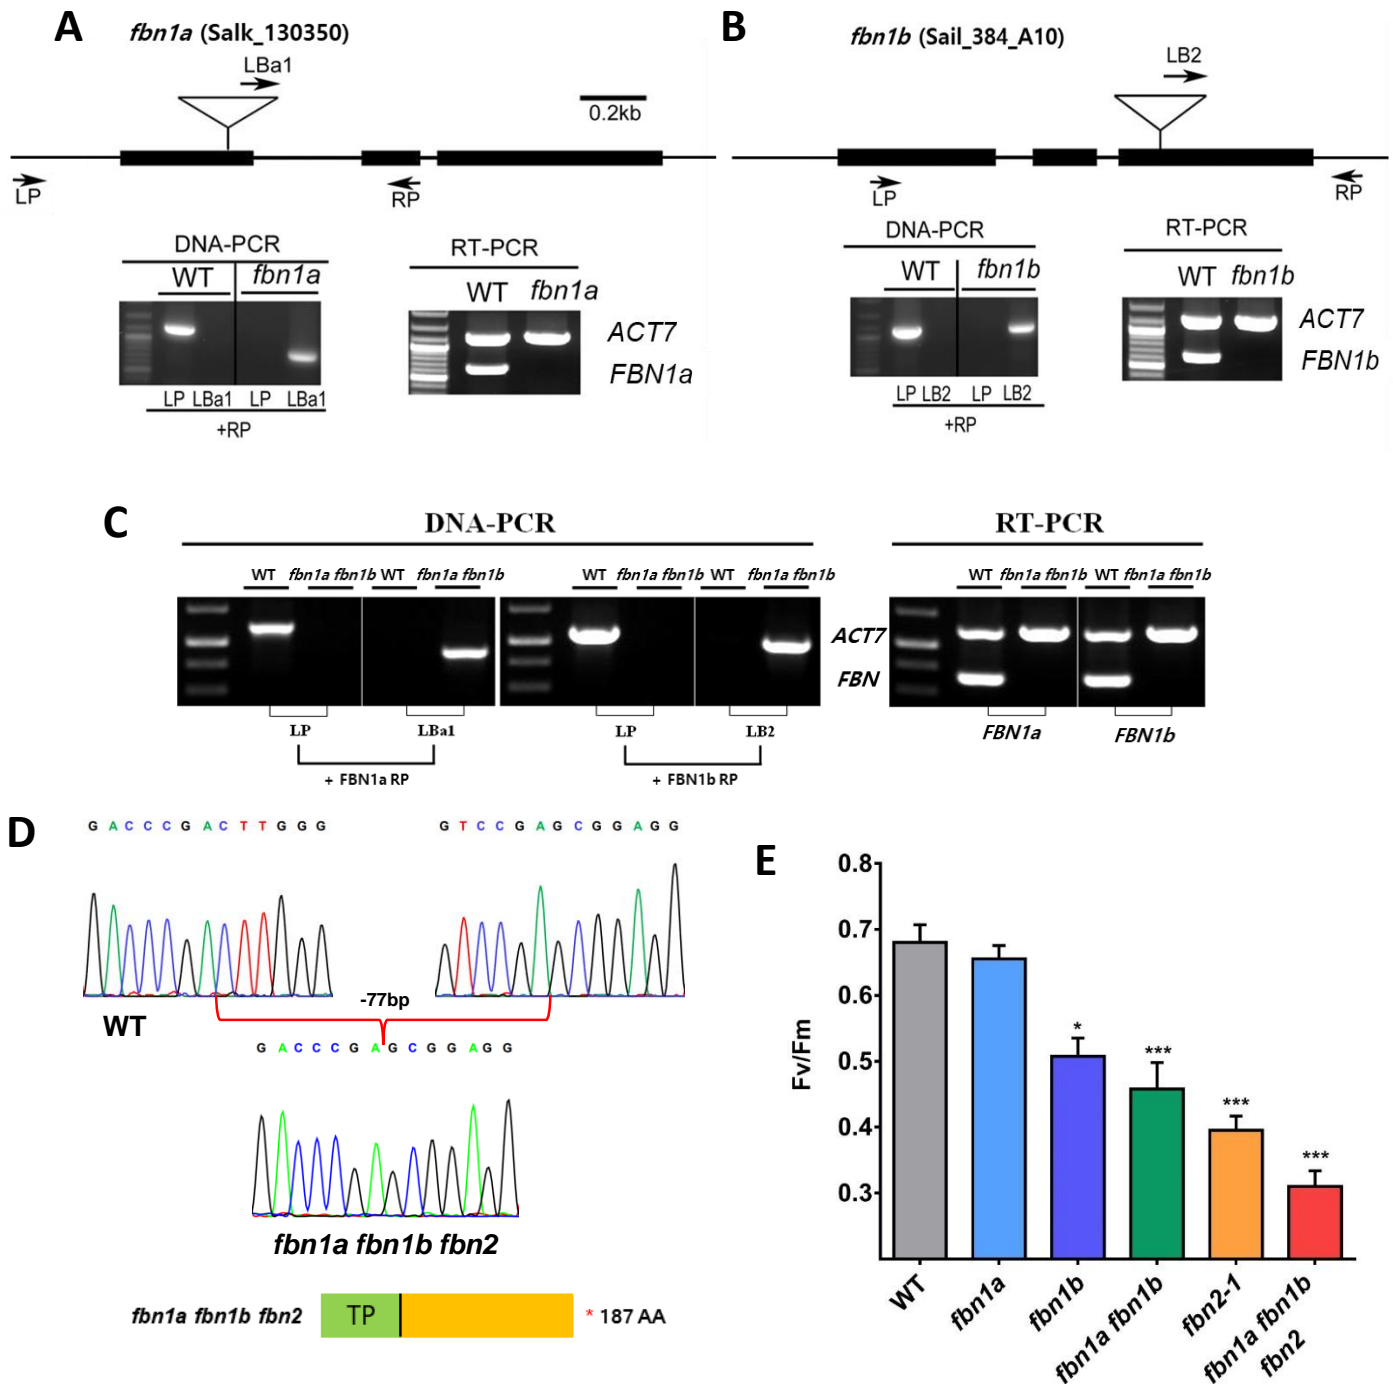

### Supplemental Figure S5. Comparison of *fbn* mutants in Arabidopsis.

Confirmation of (A) *fbn1a*, (B) *fbn1b*, and (C) *fbn1a fbn1b* T-DNA insertion mutants by DNA- and RT-PCR. (D) The *fbn1a fbn1b fbn2* triple mutant was confirmed a 77 bp deletion in the *FBN2* gene by sanger sequencing. This shows an early stop in predicted *FBN2* protein. TP, transit peptide (E) Maximum quantum yield of PSII (Fv/Fm) are measured in wild type, *fbn1a*, *fbn1b*, *fbn1a fbn1b*, *fbn2-1*, *fbn1a fbn1b*, *fbn2* at 24 h under high-light/cold stress ( $850 \mu\text{mol m}^{-2} \text{s}^{-1}$  light/ $15^\circ\text{C}$ ). Data represent means with SEM from independent samples ( $n = 4$ ). Statistically significant differences from wild type are indicated by one-way ANOVA with Tukey's post test (\* $p < 0.05$ , \*\*\* $p < 0.001$ )

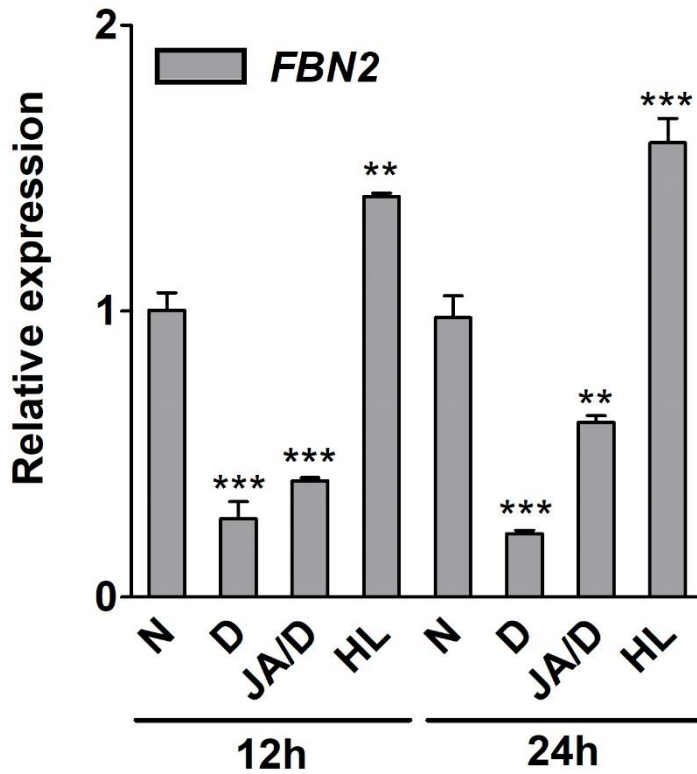

**Supplemental Figure S6. Expression of *FBN2* under dark and JA treatments.**

Expression of *FBN2* under normal (N), dark (D), MeJA/dark (JA/D), and high-light (HL) conditions in wild type plants. Data represent means with SEM from independent samples ( $n = 3$ ). Statistically significant differences from wild type are indicated by one-way ANOVA with Tukey's post test (\* $p < 0.05$ , \*\* $p < 0.01$ , \*\*\* $p < 0.001$ ). WT, wild type.



**Supplemental Table S1. Top 20 coexpressed genes with *FBN2***

| Rank | Locus     | Alias          | Function                                                           | Supportability* | MR** |
|------|-----------|----------------|--------------------------------------------------------------------|-----------------|------|
| 0    | At2g35490 | fibrillin2     | Plastid-lipid associated protein PAP / fibrillin family protein    | 3               | 0    |
| 1    | At4g38225 | unknown        | glycerol kinase                                                    | 3               | 4.4  |
| 2    | At1g10830 | Z-ISO          | 15-cis-zeta-carotene isomerase                                     | 3               | 7.9  |
| 3    | At5g06130 | chaperonin     | chaperone protein dnaJ-related                                     | 3               | 8    |
| 4    | At5g44000 | transferase    | Glutathione S-transferase family protein                           | 3               | 8    |
| 5    | At2g01110 | UNE3           | Sec-independent periplasmic protein translocase                    | 3               | 8    |
| 6    | At1g09130 | crotonase      | ATP-dependent caseinolytic (Clp) protease/crotonase family protein | 3               | 8.4  |
| 7    | At2g27680 | oxidoreductase | NAD(P)-linked oxidoreductase superfamily protein                   | 3               | 8.4  |
| 8    | At5g03880 | Thioredoxin    | Thioredoxin family protein                                         | 3               | 10.8 |
| 9    | At3g27925 | DEGP1          | DegP protease 1                                                    | 3               | 12.6 |
| 10   | At4g25130 | PMSR4          | peptide met sulfoxide reductase 4                                  | 3               | 16.2 |
| 11   | At4g14910 | HISN5B         | HISTIDINE BIOSYNTHESIS 5B                                          | 3               | 23.2 |
| 12   | At3g10670 | NAP7           | non-intrinsic ABC protein 7                                        | 3               | 25.5 |
| 13   | At1g73060 | LPA3           | Low PSII Accumulation 3                                            | 3               | 27.2 |
| 14   | At1g03680 | TRX-M1         | thioredoxin M-type 1                                               | 3               | 28.9 |
| 15   | At2g24820 | TIC55-II       | translocon at the inner envelope membrane of chloroplasts 55-II    | 3               | 28.9 |
| 16   | At4g25650 | TIC55-IV       | ACD1-like                                                          | 3               | 29   |
| 17   | At5g11840 | DUF1230        | Protein of unknown function (DUF1230)                              | 3               | 29.5 |
| 18   | At2g30950 | VAR2           | FtsH extracellular protease family                                 | 3               | 29.8 |
| 19   | At1g49970 | SVR2           | CLP protease proteolytic subunit 1                                 | 3               | 34.2 |
| 20   | At2g20860 | LIP1           | lipoic acid synthase 1                                             | 3               | 35   |

\*Reproducibility of a coexpressed gene; Threshold E-03

\*\*Coexpressed degree is represented as Mutural Rank (MR) value

**Supplemental Table S2. Oligonucleotides used in this study**

| Gene                 | Forward primer (5'-3')             | Reverse primer (5'-3')          |
|----------------------|------------------------------------|---------------------------------|
| RT-qPCR              |                                    |                                 |
| <i>eIF4a</i>         | TGACCACACAGTCTCTGCAA               | ACCAGGGAGACTTGTTGGAC            |
| <i>FBN1a</i>         | ACCAATCGAAATCTCCGATCC              | TCCATCTTGACCCCATTCGT            |
| <i>FBN1b</i>         | AGCTGCCAAACCAGAGTTTCA              | AGATCATCGGGCGGTGAATA            |
| <i>FBN2</i>          | CCCCGGTGATCAAATCAAGT               | CCAGAGAGTGCCCGTGAAAT            |
| <i>PAP1</i>          | AGATAAGAAGAAAGACCAACTAGTGA         | CCAAGGTGTCCCCCTTTTC             |
| <i>DFR</i>           | TGGTGGTCCGGTCCATTCAT               | GAGAGAGCGCGGTGATAAGG            |
| <i>LDOX</i>          | CGTGTCAAGAAAGCCGGAGA               | GTCCACTCGCGTTGTTAGCC            |
| <i>LOX3</i>          | CACCTCCAGTCGATGCAACC               | CCAAGCATGCATGTGTCCGT            |
| <i>LOX4</i>          | CCATCGAGCTAAGCCTCCCT               | CTTGGCTAGCTGCCACATCC            |
| <i>PES1</i>          | CAATGCTCCCCTTCTCTCTG               | AGCATGGATGCGGGAATTGG            |
| <i>PES2</i>          | CCCGATGGTCTTCCAACGC                | GCCCATTGCTGGACAGAAA             |
| <i>PGM48</i>         | AAGTGTGATCACGGCGTGTG               | CAGCTCTGCTGAACGTAGCC            |
| <i>PPH</i>           | CCGTGGGCTGATCAACTTGT               | GAGGATGGGTTGCTGCAAAG            |
| <i>CCD4</i>          | ACGTCTCCGTCGTTTCTCCA               | CAACCGGAGAACCACCTTCG            |
| <i>PG SAG</i>        | AAGGCACCGAAGAGGAACCA               | GGCTCCACGGAGCTCAAGAA            |
| <i>SAG12</i>         | GAGCAAGCACTGATGAAGGC               | GCACTCTCCAGTGAACACACC           |
| DNA-PCR              |                                    |                                 |
| <i>FBN1a-LP,RP</i>   | TTCTCCCCACACAAATAATG               | TGAAGCTATCGGAATCAATGG           |
| <i>FBN1b-LP,RP</i>   | AGAGTTTTCAAAGTCCGAGCC              | GGCCATAGACGAGATGTTCTG           |
| <i>Lba1</i>          | TGGTTCACGTAGTGGGCCATCG             |                                 |
| <i>LB2</i>           | GCTTCCTATTATATCTTCCCAAATTACCAATACA |                                 |
| RT-PCR               |                                    |                                 |
| <i>FBN1a</i>         | GAGTATTTGCCTCATCTTCAACCG           | AGCCACGACTGCGTGTGTCACTA         |
| <i>FBN1b</i>         | ATACGGGAGAGATAGGATCAGCTC           | AGCCAAGACTGCGCATTGTCCGCC        |
| <i>FBN2</i>          | GGGGTGAGAAACCTGGAGAT               | TGTCGAACCCGCAGCTAGTAG           |
| <i>ACT7</i>          | TCCATTTCTCTATCTTCTCTCTCGCTG        | CAAACCTACCACCACGAACCAGATAA      |
| Vector construction  |                                    |                                 |
| <i>FBN1aPro-GUS</i>  | GAAGTTCCTATGAACAGGTTTAC            | TTTTGTGTTTGTCTTTCAGAGAAACCTCAC  |
| <i>FBN1bPro-GUS</i>  | CATTATTCACAGTTTGTGACTTACTT         | TTTTTTTTGTTTCTTCGACTAAAATTTCAAG |
| <i>FBN2Pro-GUS</i>   | ATATTTACTCTTTTGGTGAAACTAGTCT       | GGCCGATCTTTGTGTTTCGAGCTTGGTGA   |
| <i>FBN2 sgRNA1</i>   | TGTGGTCTCAAATTGGAATCCGGGACCCG      |                                 |
| <i>For</i>           | G                                  |                                 |
|                      | TTTAGTTTTAGAGCTAGAAATAGCAAG        |                                 |
| <i>FBN2 sgRNA2</i>   | TGTGGTCTCAAATTGTGCGGTGTCTGACC      |                                 |
| <i>For</i>           | C                                  |                                 |
|                      | GACTGTTTTAGAGCTAGAAATAGCAAG        |                                 |
| <i>CRISPR</i>        |                                    | TGTGGTCTCAAGCGTAATGCCAACTTTGTAC |
| <i>universal Rev</i> |                                    |                                 |
| <i>CR_PICH61</i>     | TCCTGTCAAACACTGATAG                | TAATGTACTGGGGTGGATGCAG          |
| <i>CR_PAGM4723</i>   | ATAAGCCCATCAGGGAGCAG               | CGGATAAACCTTTTCACGCC            |
| <i>CR FBN2</i>       | GGGGTGAGAAACCTGGAGAT               | TACTCCGGCTCCGTTAGAGA            |



VTE1-  
*Xba1/BamH1*

GGTCTAGAATGGAGATACGGA

TGGATCCACAGACCCGGT

---

Yeast two hybrid (Gateway system)

---

|               |                                     |                                           |
|---------------|-------------------------------------|-------------------------------------------|
| <i>FBN1a</i>  | AAAAAGCAGGCTGTGCGACGGACATCGA        | AGAAAGCTGGGTGTTAAGGGTTTAAGAGAGAGC         |
| <i>FBN1b</i>  | AAAAAGCAGGCTGTGCCACAGATACGGG        | AGAAAGCTGGGTGTCAAGGATTCAAGAGAG            |
| <i>FBN2</i>   | AAAAAGCAGGCTGTTCTTCTCTGCCCTC        | AGAAAGCTGGGTGTCAGAGCTCAAGCAGA             |
| <i>FBN4</i>   | AAAAAGCAGGCTGTTCATCATCTGGATCA<br>G  | AGAAAGCTGGGTGTTAAGCAATGACGAATAC           |
| <i>FBN7a</i>  | AAAAAGCAGGCTGTGCTATGGTTCAAGA<br>CT  | AGAAAGCTGGGTGTTAACTGTTGTATTCAAGATT        |
| <i>FBN7b</i>  | AAAAAGCAGGCTGTGCAATGGTGCAGGA<br>A   | AGAAAGCTGGGTGCTAGTGCAGATTTGAGCG           |
| <i>FBN8</i>   | AAAAAGCAGGCTGTGTAGCTGTAGCTTCT<br>GG | AGAAAGCTGGGTGTCACAGCTCGAGGGG              |
| <i>VTE1</i>   | AAAAAGCAGGCTGTGTTTCCATCCCAGAG<br>A  | AGAAAGCTGGGTGTTACAGACCCGGTGG              |
| <i>CCD4</i>   | AAAAAGCAGGCTGTCCGCCGTCGTCGA<br>A    | AGAAAGCTGGGTGTTAAAGCTTATTAAGGTCACTT<br>TC |
| <i>NDC1</i>   | AAAAAGCAGGCTGTGCAGTGACAAACAA<br>CA  | AGAAAGCTGGGTGTCAAGAACCAGACAAAA            |
| <i>ABC1K1</i> | AAAAAGCAGGCTGTGCGATGAGCGGGGT<br>G   | AGAAAGCTGGGTGTCATCTGTCCGATAATACTG         |
| <i>ABC1K3</i> | AAAAAGCAGGCTGTGCGGCCCTGGTACA<br>A   | AGAAAGCTGGGTGCTATGGGGATGGTGCA             |
| <i>ABC1K9</i> | AAAAAGCAGGCTGTCAAAGCCAGATAGA<br>GA  | AGAAAGCTGGGTGTTAGTTGAAGCTGTCC             |

---
